# Supplementary material for: KI mediated one-pot cascade reaction for synthesis of 1,3,4-selenadiazoles
Source: Royal Society of Chemistry journal article supplement (doi:10.1039/d4ra01994f), 2024-01-01

## KI mediated one-pot cascade reaction for synthesis of 1,3,4-selenadiazoles

Kumaresh Datta,<sup>a</sup> Bijeta Mitra,<sup>a</sup> Gyan Chandra Pariyar,<sup>b</sup> and Pranab Ghosh\*<sup>a</sup>

<sup>a</sup>Department of Chemistry, University of North Bengal, Dist. Darjeeling, West Bengal, India.

<sup>b</sup>Department of Food Technology, University of North Bengal, Dist. Darjeeling, West Bengal, India.

Tel.: +91 (0353) 2776381; fax: +91 (0353) 2699001.

**E-mail address: pizy12@yahoo.com (P. Ghosh).**

### List of contents

| Sl. no. | Title                                                                                                                               | Page no |
|---------|-------------------------------------------------------------------------------------------------------------------------------------|---------|
| I       | General information                                                                                                                 | 1       |
| II      | General procedure for the synthesis of functionalized 2,5- diphenyl-1,3,4-selenadiazole                                             | 1       |
| III     | Spectroscopy data of various 2,5- diphenyl-1,3,4-selenadiazole derivatives                                                          | 2       |
| IV      | Scanned copies of <sup>1</sup> H, <sup>13</sup> C, <sup>19</sup> F NMR spectra of the 2,5- diphenyl-1,3,4-selenadiazole derivatives | 4       |

### Experimental section

#### I.General information

All the compounds were purchased from commercial suppliers and used without further purification. All the products were purified by column chromatography on silica gels (60–120 mesh, SRL, India). For TLC, Merck plates coated with silica gel 60, F<sub>254</sub> were used. <sup>1</sup>H NMR, <sup>13</sup>C NMR, <sup>19</sup>F NMR were recorded using 400 MHz, 100 MHz, respectively on Bruker AV 400 NMR spectrometer using TMS as internal standard. Splitting patterns of protons were described as s (singlet), d (doublet), t (triplet) and m (multiplet).

#### General procedure for the synthesis of functionalized 2,5- diphenyl-1,3,4-selenadiazole

A mixture of benzaldehyde (2 mmol), hydrazine (1 mmol) and selenium powder (1 mmol), potassium persulphate (1mmol) were stirred at 140 °C for 5 h under DMSO solvent in open air in a round-bottom flask (50 mL) using a magnetic stirring bar. The reaction progress was monitored using TLC with a mixture of ethyl acetate and *n*-hexane as the eluent system. After completion of the reaction, the mixture was quenched to room temperature and ethyl acetate (5 ml) was added to the reaction mixture and the catalyst was separated by simple filtration and was extracted with ethyl acetate twice (2×20 ml). Combined extracts were washed with distilled water, dried over anhydrous Na<sub>2</sub>SO<sub>4</sub> and concentrated. The crude product was purified by passing through a column packed with silica gel (eluent: ethyl acetate–petroleum ether). The products obtained were known compounds and were identified by NMR spectroscopy.

### **III. Spectroscopy data of functionalized 2,5- diphenyl-1,3,4-selenadiazole:**

Pale yellow solid; mp 212-214 °C

<sup>1</sup>H NMR (400 MHz, DMSO) δ(ppm): 8.15 (d, *J* = 8.52Hz, 1H), 8.31 (d, *J* = 8.72 Hz, 1H)

<sup>13</sup>C NMR (100 MHz, DMSO) δ (ppm): 124.17, 131.15, 136.86, 150.46, 166.31

#### **2,5-di(naphthalen-2-yl)-1,3,4-selenadiazole**

White solid; mp 135-138 °C

<sup>1</sup>H NMR (400 MHz, DMSO) δ(ppm): 7.39-7.45 (m, 2H), 7.57-7.65 (m, 3H), 7.77-8.21 (m, 1H), 8.62 (s, 1H),

<sup>13</sup>C NMR (100 MHz, DMSO) δ (ppm): 125.63, 127.25, 128.10, 128.61, 128.76, 129.73, 130.99, 132.60, 135.38, 167.93

#### **2,5- diphenyl-1,3,4-selenadiazol**

White solid; mp 116-118 °C

<sup>1</sup>H NMR (400 MHz, DMSO) δ(ppm): 7.30 (t, *J* = 7.16Hz, 2H), 7.50 (t, *J* = 7.56Hz, 1H), 8.13 (d, *J* = 7.92Hz, 2H)

<sup>13</sup>C NMR (100 MHz, DMSO) δ (ppm): 129.03, 129.72, 131.23, 133.32, 167.79

#### **2,5-bis(4-(trifluoromethyl)phenyl)-1,3,4-selenadiazole**

White solid; mp 154-156 °C

<sup>1</sup>H NMR (400 MHz, DMSO) δ(ppm): 7.88 (d, *J* = 8.32Hz, 2H), 8.12 (t, *J* = 8.16Hz, 2H)

#### **2,5-bis(3-fluorophenyl)-1,3,4-selenadiazole**

White solid; mp 142-145 °C

<sup>1</sup>H NMR (400 MHz, DMSO) δ(ppm): 7.46-7.50 (m, 2H), 7.65 (t, *J* = 7.84Hz, 1H), 7.79 (d, *J* = 7.6Hz, 1H)

<sup>13</sup>C NMR (100 MHz, DMSO) δ (ppm): 116.08, 116.30, 120.22, 120.43, 125.89, 131.22, 131.30, 133.65, 133.72, 161.20, 163.63, 166.65

**2,5-bis(3-nitrophenyl)-1,3,4-selenadiazole**

Yellow solid; mp 201-203 °C

<sup>1</sup>H NMR (400 MHz, DMSO) δ(ppm): 7.80 (t, *J* = 7.96Hz, 1H), 8.34 (d, *J* = 7.72Hz, 1H), 8.44-8.47 (m, 1H), 8.60 (t, *J* = 1.64Hz, 1H)

<sup>13</sup>C NMR (100 MHz, DMSO) δ (ppm): 124.13, 127.79, 130.99, 132.90, 135.82, 148.32, 165.97

**2,5-bis(4-fluorophenyl)-1,3,4-selenadiazole**

White solid; mp 151-154 °C

<sup>1</sup>H NMR (400 MHz, DMSO) δ(ppm): 7.33 (q, *J* = 8.76Hz, 2H), 7.98-8.21 (m, 2H)

<sup>13</sup>C NMR (100 MHz, DMSO) δ (ppm): 115.98, 116.20, 127.84, 132.52, 132.61, 164.12, 166.61, 166.83

**2,5-di([1,1'-biphenyl]-4-yl)-1,3,4-selenadiazole**

Brown solid; mp 145-147 °C

<sup>1</sup>H NMR (400 MHz, DMSO) δ(ppm): 7.36 (t, *J* = 7.28Hz, 1H), 7.42-7.73 (m, 2H), 8.02 (d, *J* = 8.28Hz, 1H)

<sup>13</sup>C NMR (100 MHz, DMSO) δ (ppm): 127.20, 127.34, 128.72, 129.51, 129.95, 130.47, 139.38, 144.78, 167.77

**2,5-di(thiophen-3-yl)-1,3,4-selenadiazole**

Off white solid; mp 232-237 °C

<sup>1</sup>H NMR (400 MHz, DMSO) δ(ppm): 7.17 (t, *J* = 3.8Hz, 1H), 7.71 (t, *J* = 2.48Hz, 1H), 8.84 (d, *J* = 4.72Hz, 1H)

<sup>13</sup>C NMR (100 MHz, DMSO) δ (ppm): 128.78, 133.68, 133.73, 163.52

**2,5-bis(2-chlorophenyl)-1,3,4-selenadiazole**

White solid; mp 128-131 °C

<sup>1</sup>H NMR (400 MHz, DMSO) δ(ppm): 7.40-7.44 (m, 1H), 7.51-7.53 (m, 1H), 7.75 (d, *J* = 6.84Hz, 1H)

$^{13}\text{C}$  NMR (100 MHz, DMSO)  $\delta$  (ppm): 127.72, 131.03, 131.15, 131.89, 133.06, 167.34

**2,5-bis(2-bromophenyl)-1,3,4-selenadiazole**

Light brown solid; mp 125-127 °C

$^1\text{H}$  NMR (400 MHz, DMSO)  $\delta$ (ppm): 7.41-7.49 (m, 1H), 7.70-7.55 (m, 1H)

$^{13}\text{C}$  NMR (100 MHz, DMSO)  $\delta$  (ppm): 120.38, 128.18, 131.03, 132.99, 134.21, 167.85

**2,5-di-p-tolyl-1,3,4-selenadiazole**

Off white solid; mp 143-146 °C

$^1\text{H}$  NMR (400 MHz, DMSO)  $\delta$ (ppm): 7.27 (d,  $J = 7.92\text{Hz}$ , 2H), 7.83 (t,  $J = 8.08\text{Hz}$ , 2H)

$^{13}\text{C}$  NMR (100 MHz, DMSO)  $\delta$  (ppm): 128.45, 129.54, 129.78, 143.47, 167.81

**2,2'-(1,3,4-selenadiazole-2,5-diyl)diphenol**

White solid; mp 162-165 °C

$^1\text{H}$  NMR (400 MHz, DMSO)  $\delta$ (ppm): 6.97 (t,  $J = 7.6\text{Hz}$ , 1H), 7.05 (d,  $J = 8.4\text{Hz}$ , 1H), 7.37 (t,  $J = 7.6\text{Hz}$ , 1H), 7.97 (t,  $J = 7.4\text{Hz}$ , 1H)

$^{13}\text{C}$  NMR (100 MHz, DMSO)  $\delta$  (ppm): 111.07, 116.90, 119.95, 120.25, 129.57, 133.15, 155.85

**4,4'-(1,3,4-selenadiazole-2,5-diyl)bis(2-methoxyphenol)**

Off white solid; mp 187-189 °C

$^1\text{H}$  NMR (400 MHz, DMSO)  $\delta$ (ppm): 6.89-6.95 (m, 2H), 7.08 (d,  $J = 1.6\text{Hz}$ , 1H)

**II.Scanned copies of  $^1\text{H}$ ,  $^{13}\text{C}$ , NMR spectra of the functionalized diethyl 2,5- diphenyl-1,3,4-selenadiazole:**

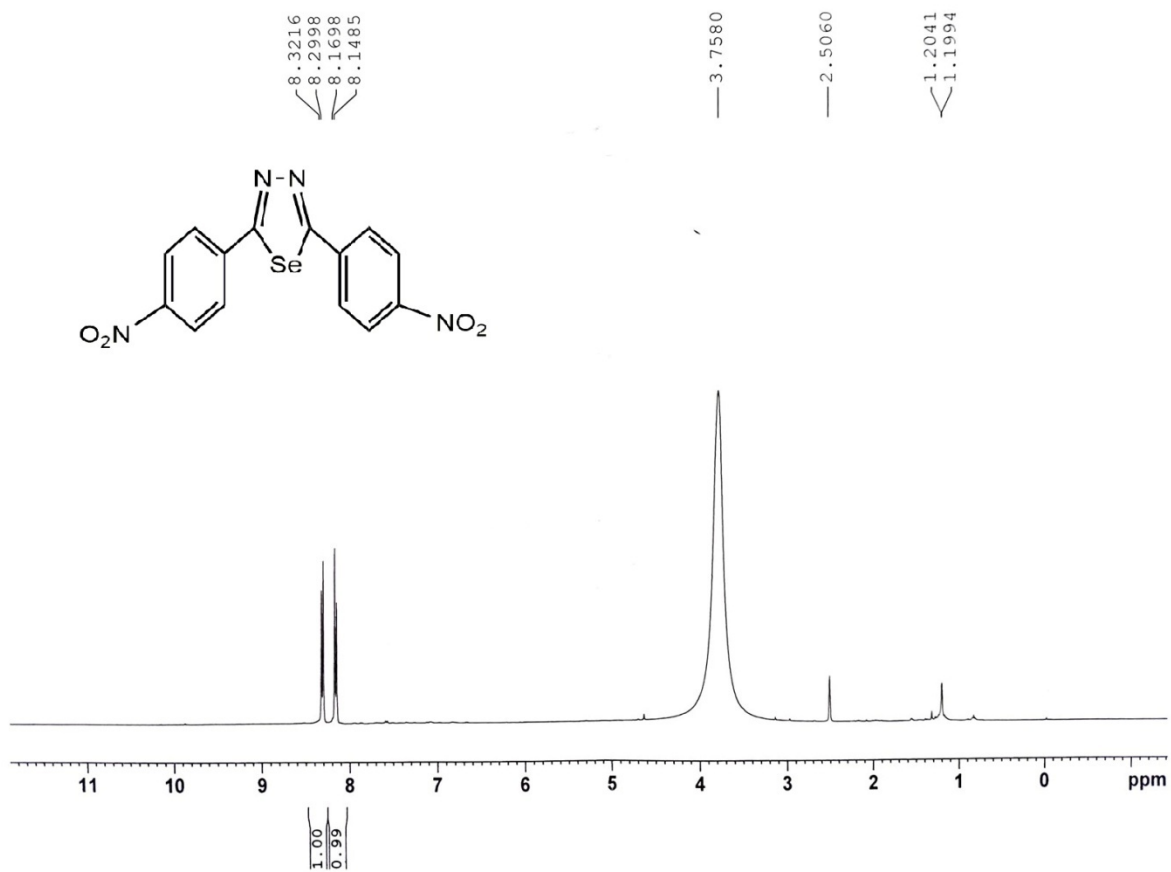

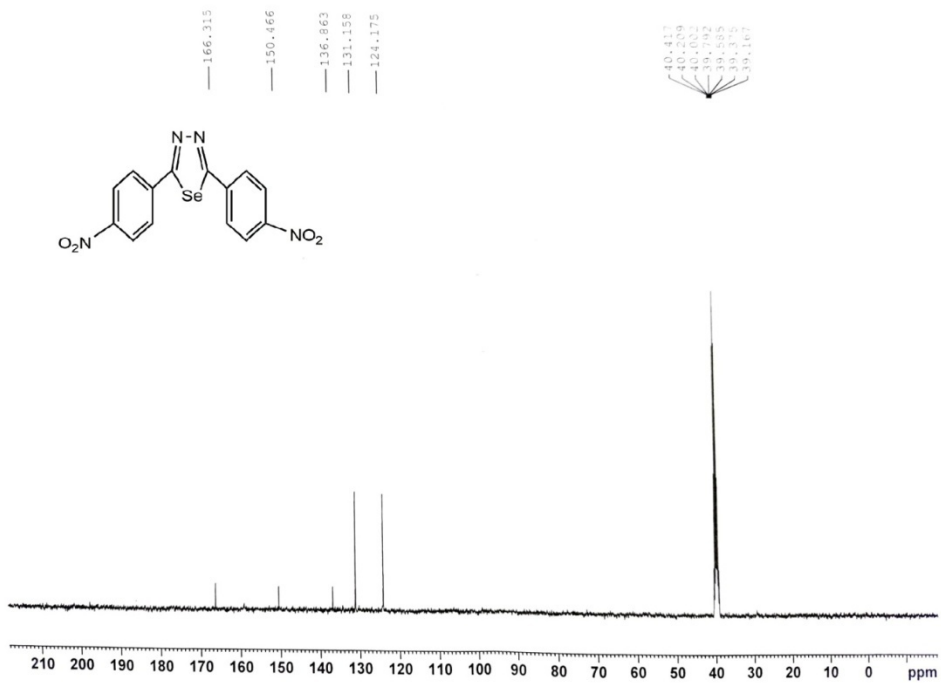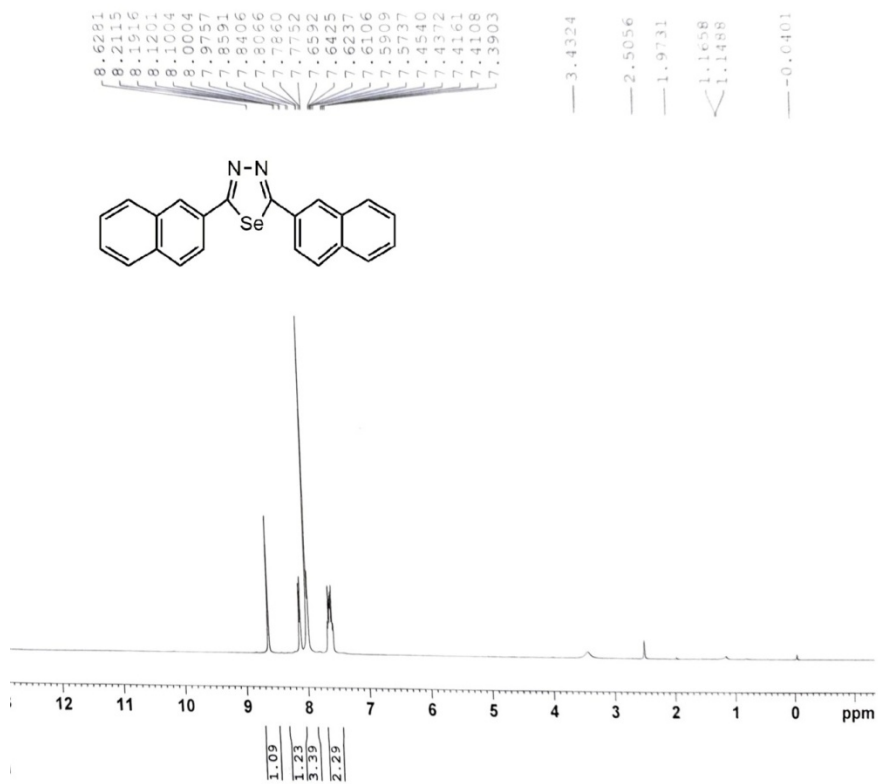

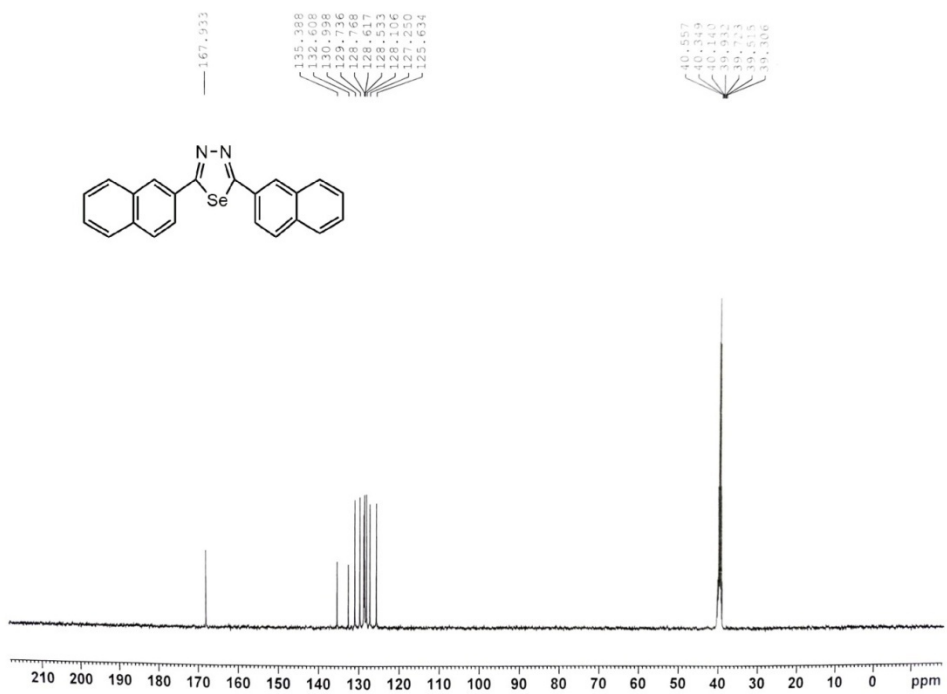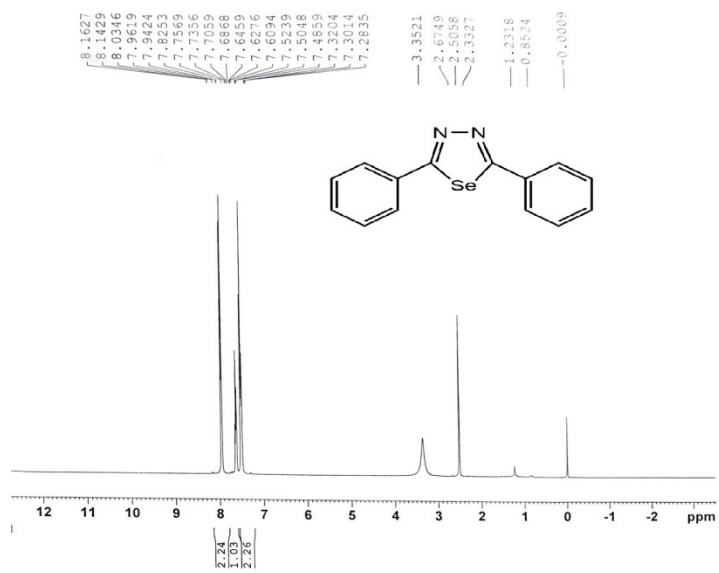

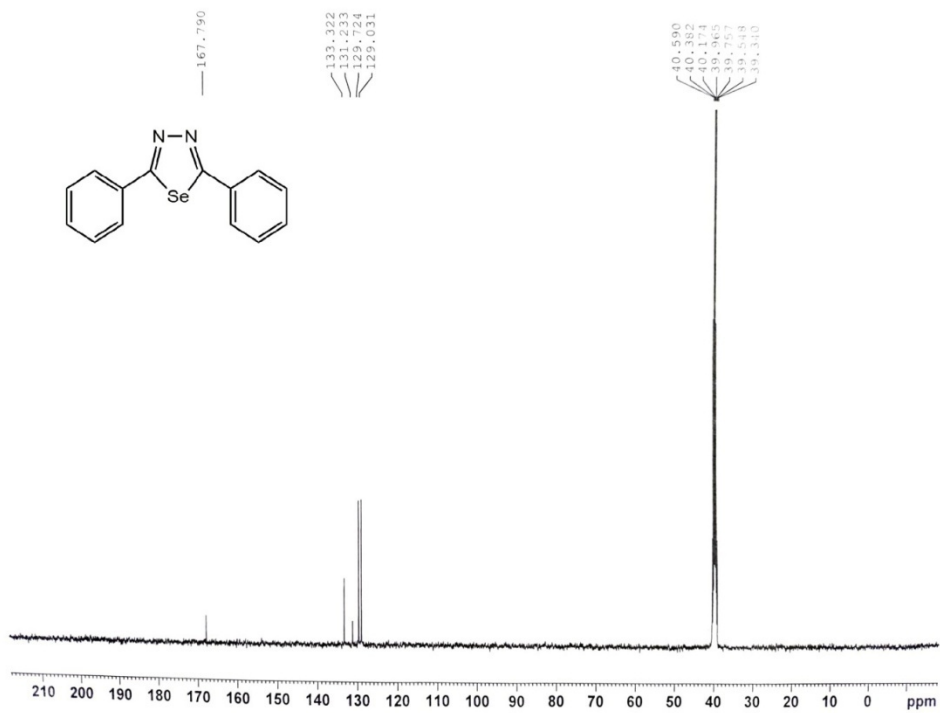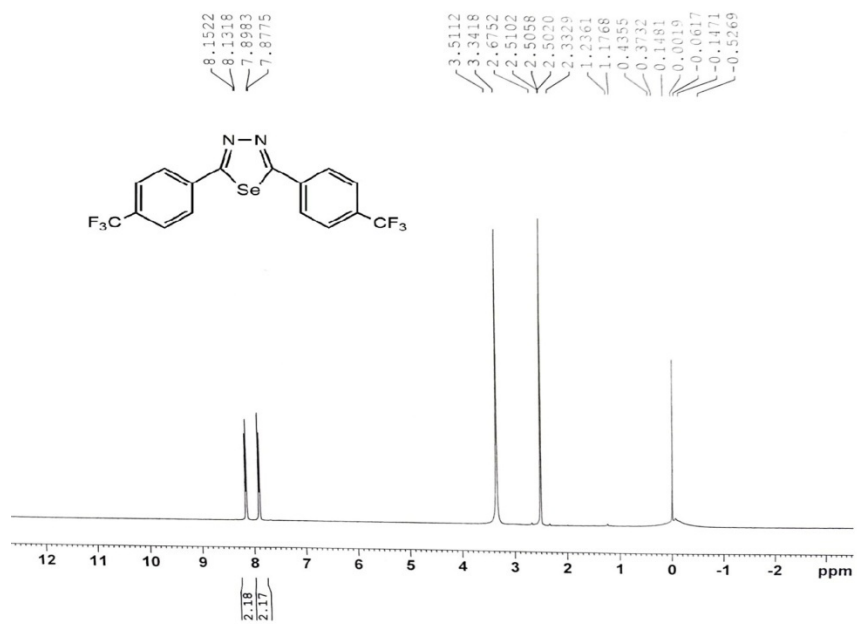



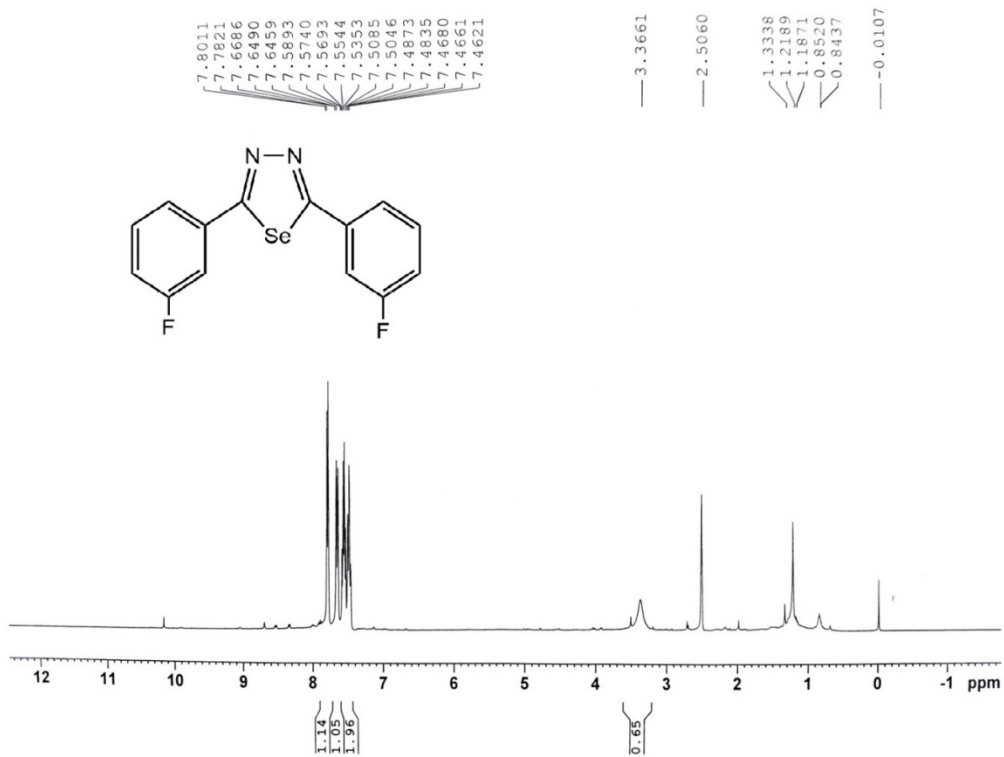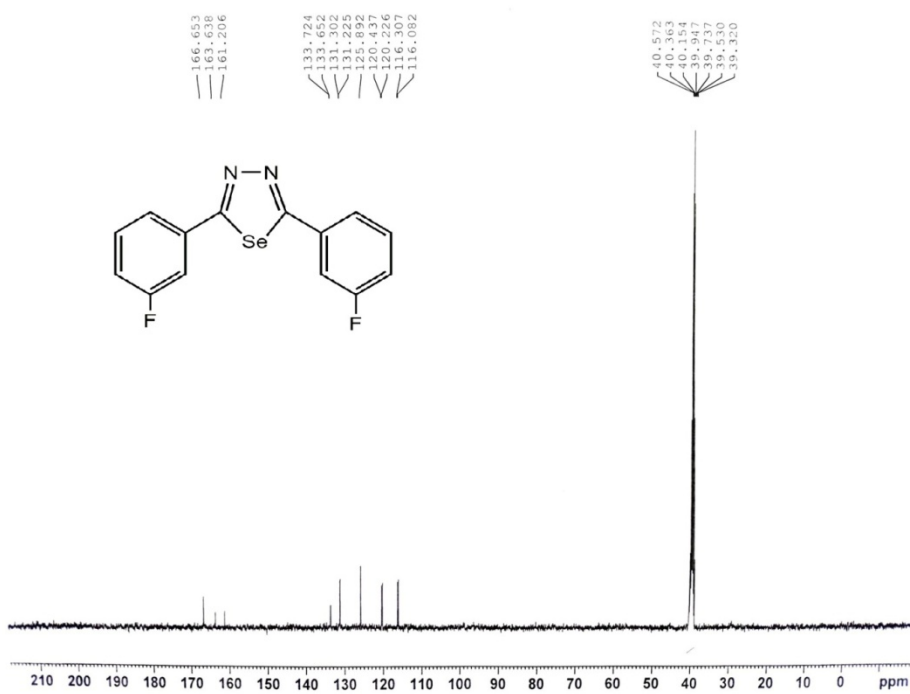



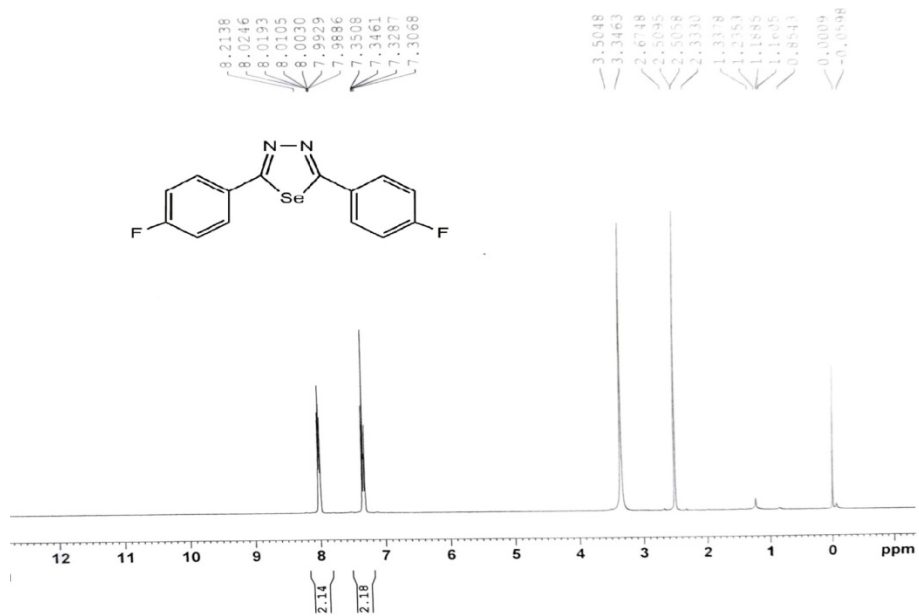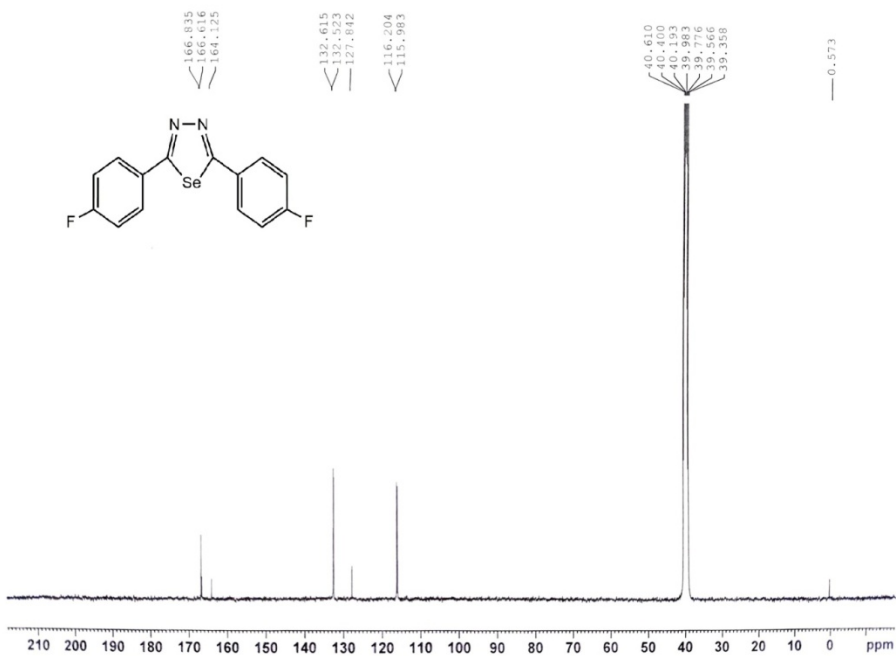

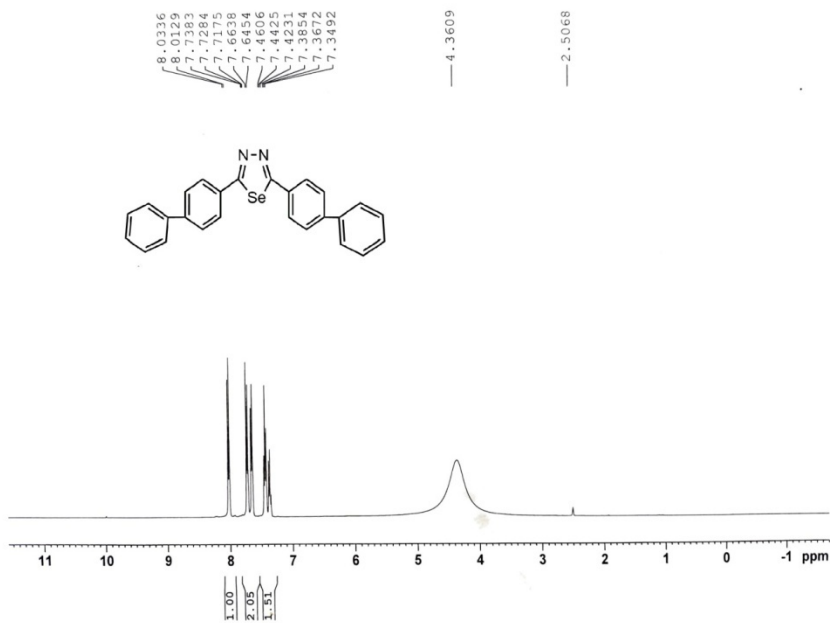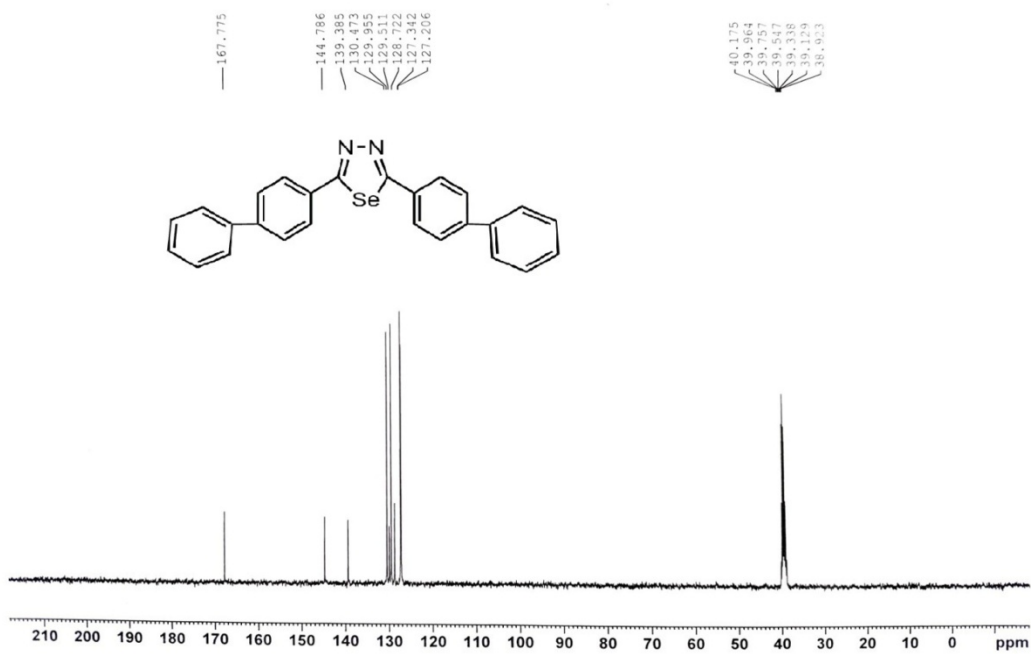

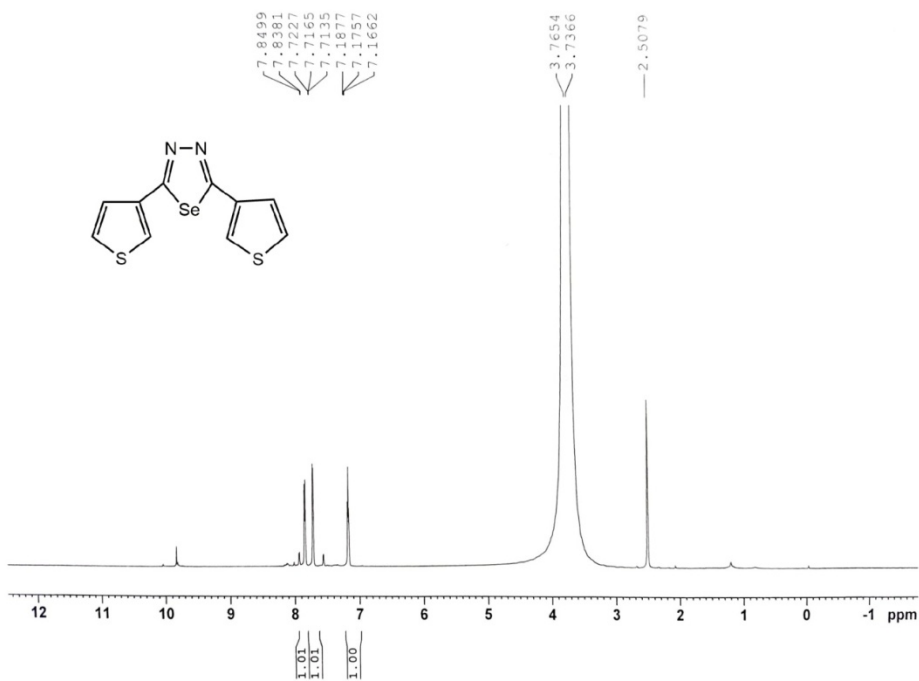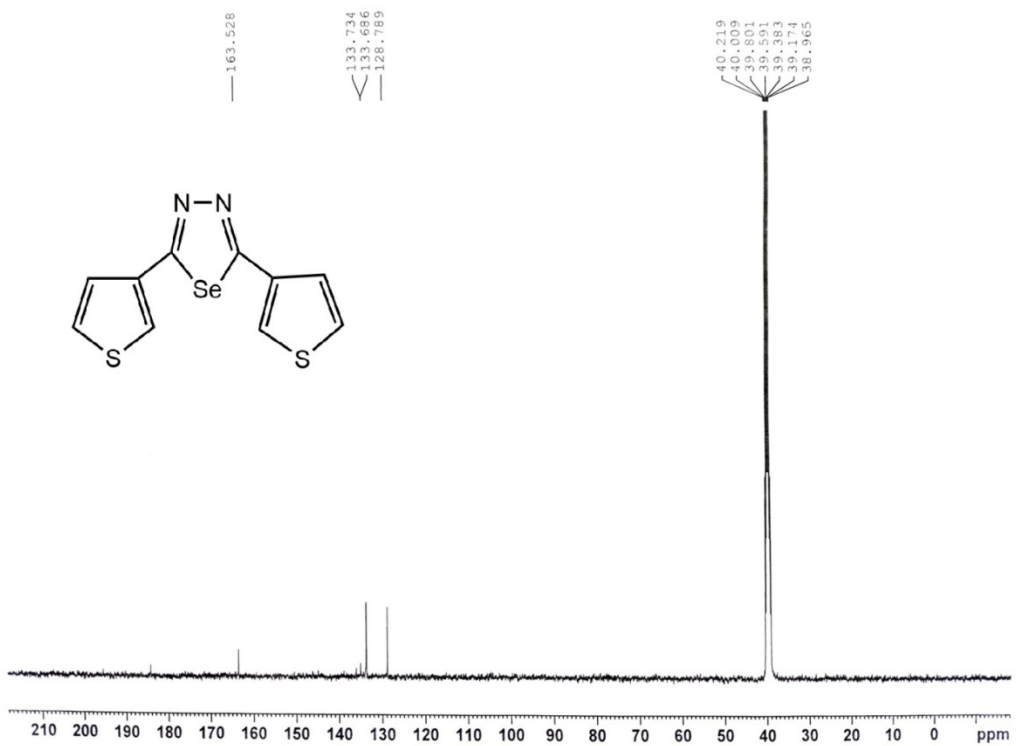

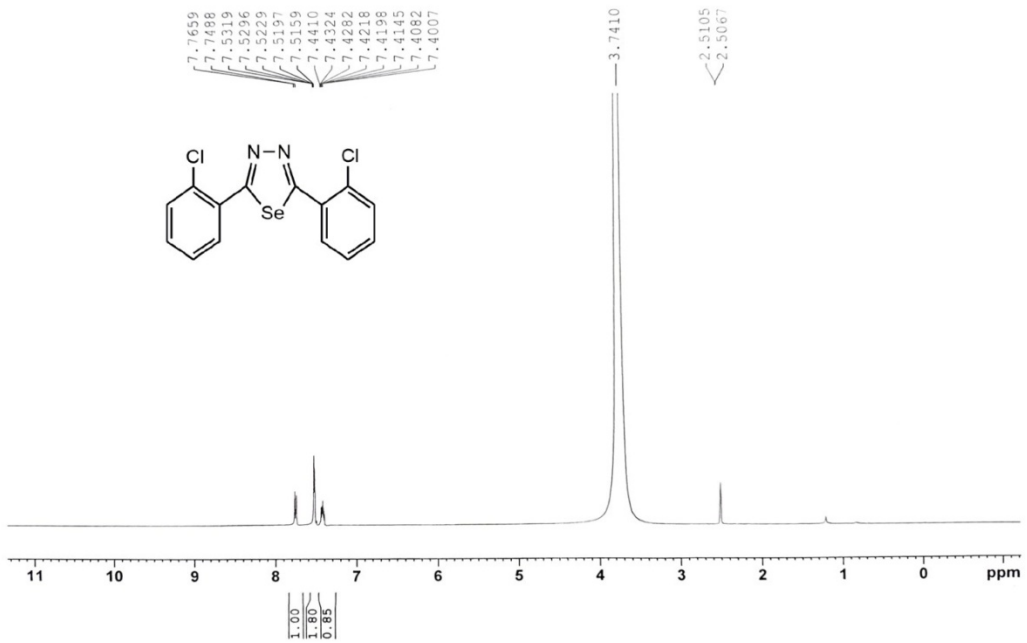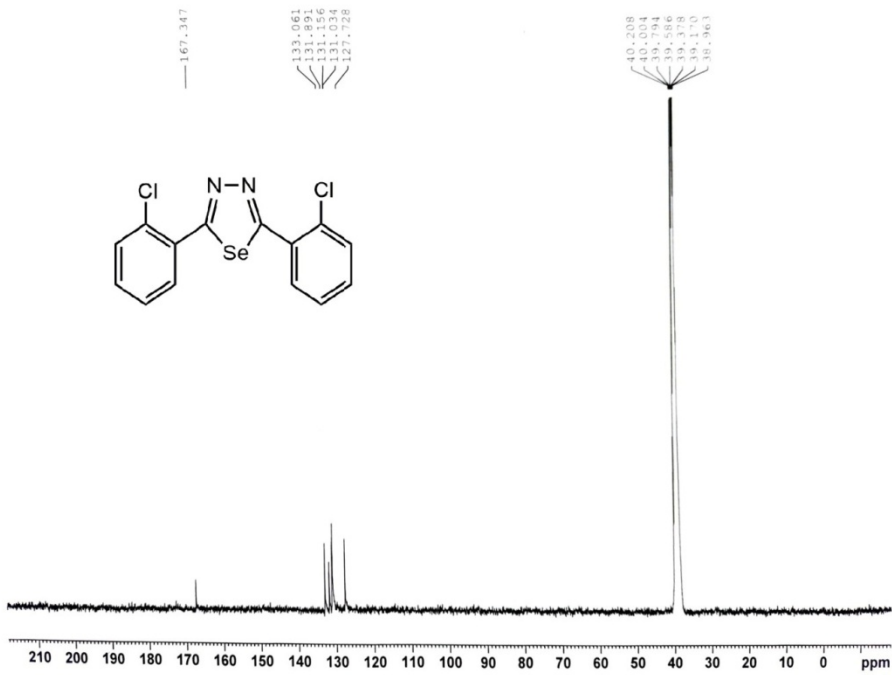

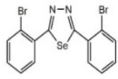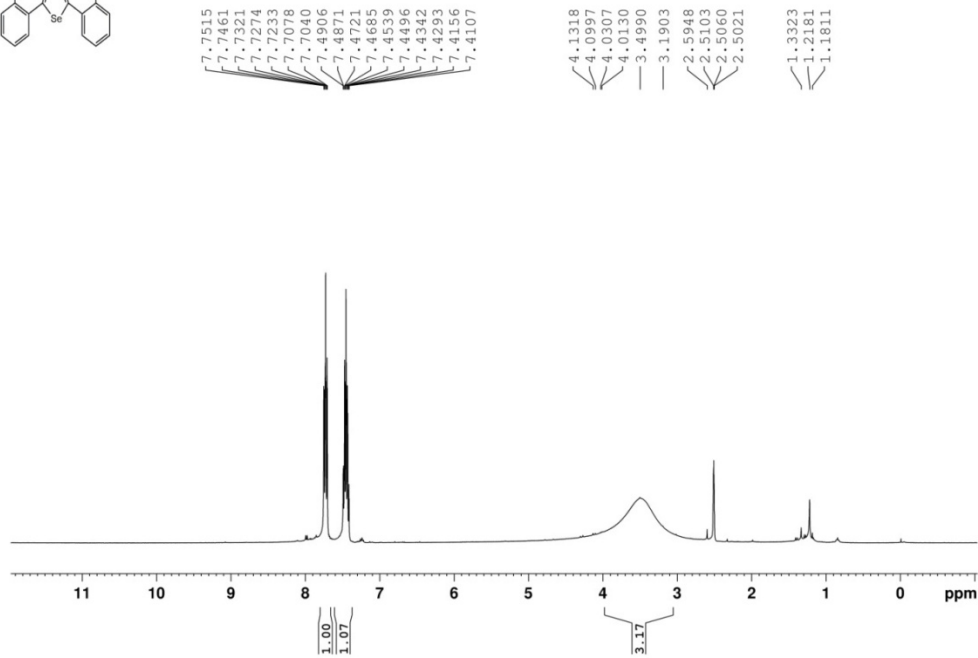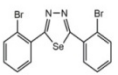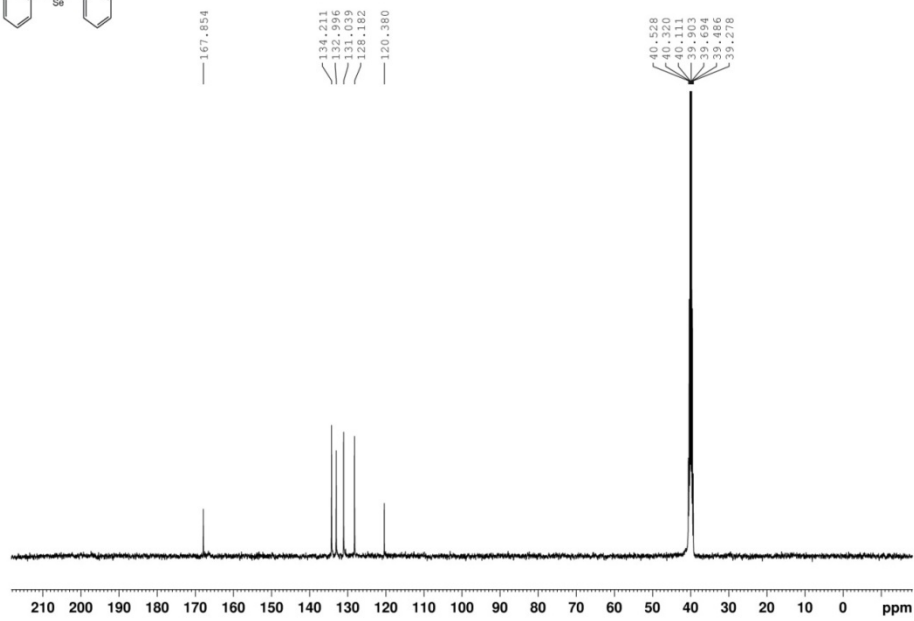

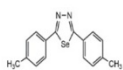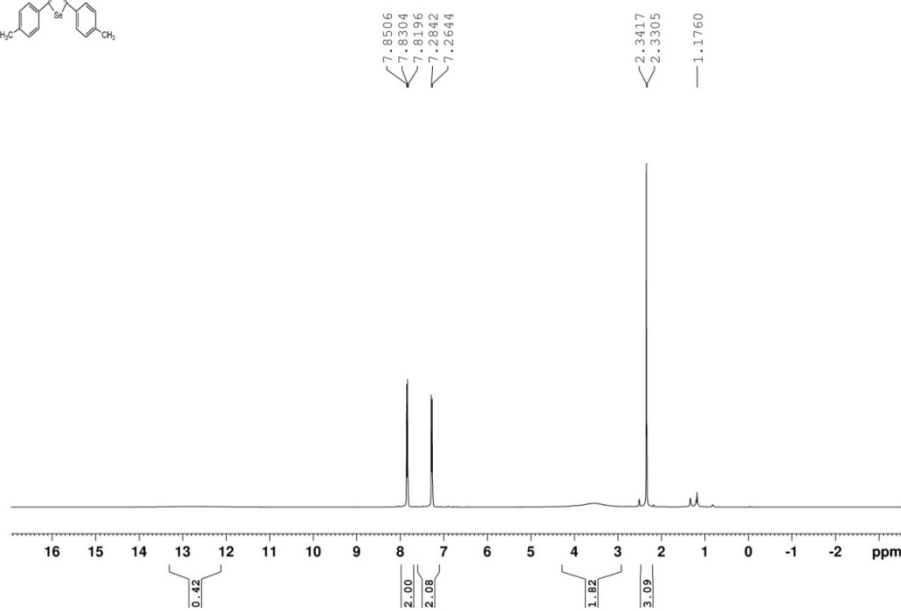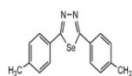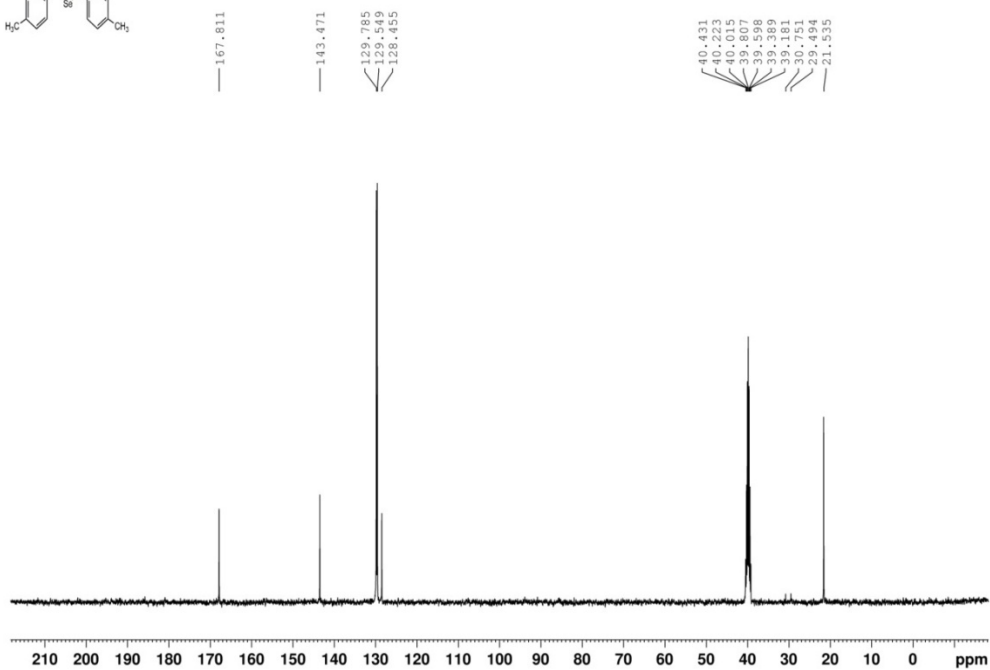



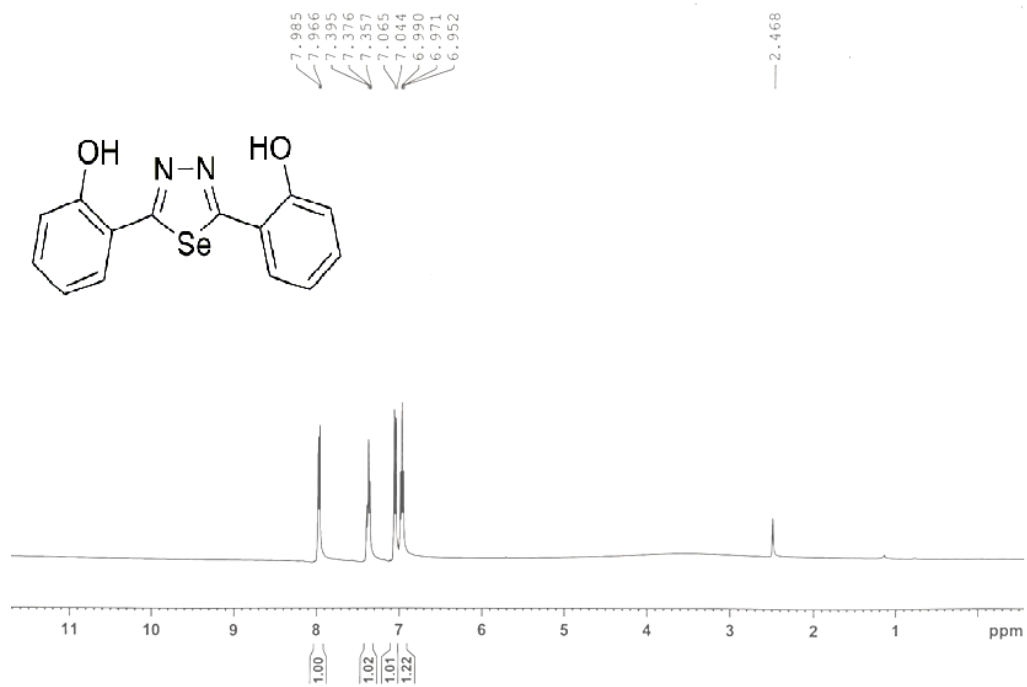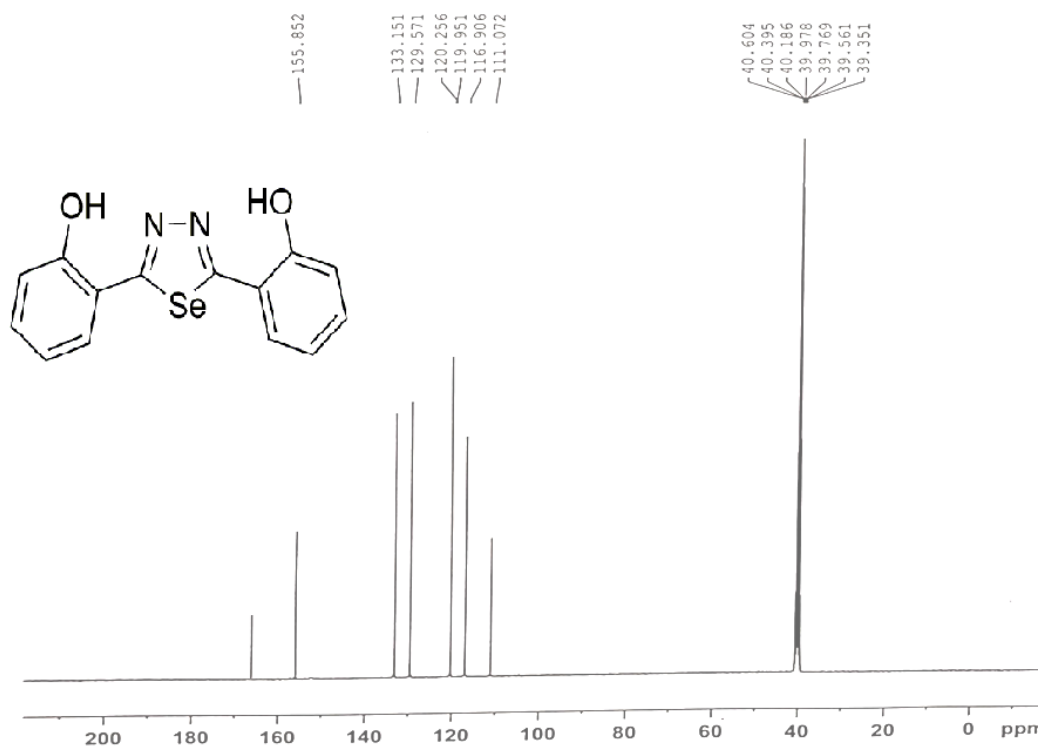

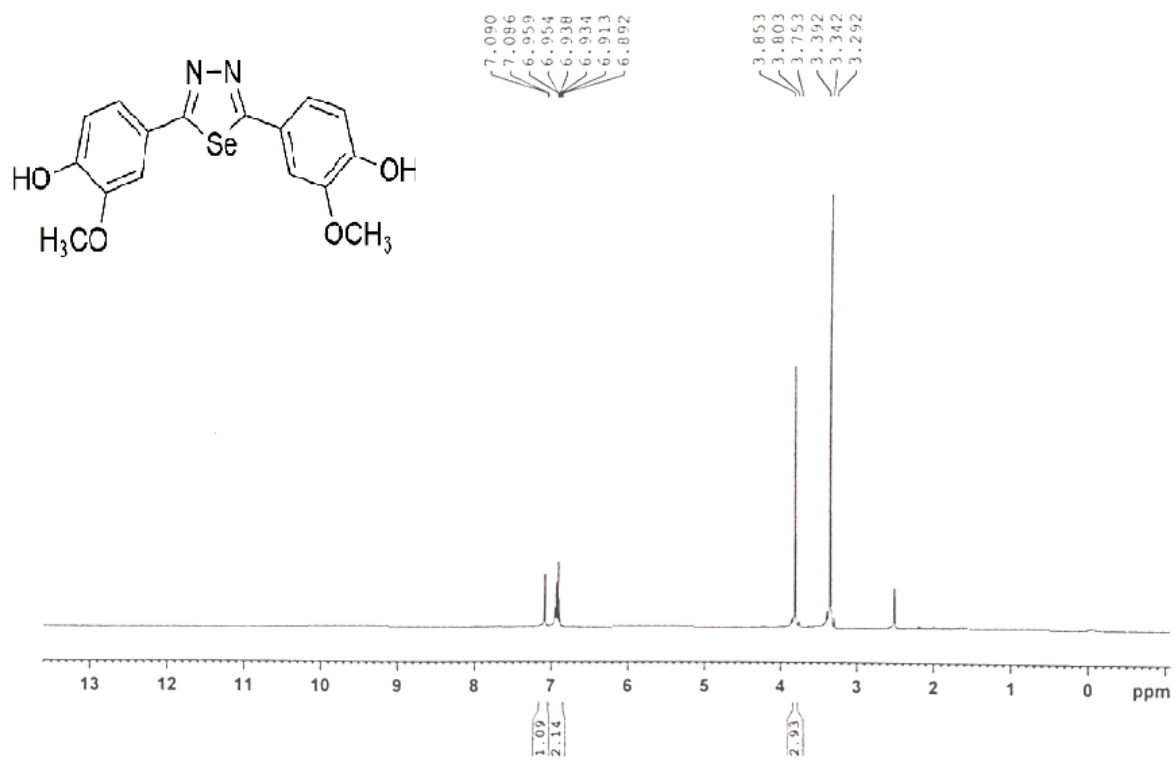

Supplement: d4ra01994f1.pdf [file d4ra01994f1.pdf]
